# Supplementary material for: The Jag2/Notch1 signaling axis promotes sebaceous gland differentiation and controls progenitor proliferation
Source: eLife. 2024 Nov 25;13:RP98747. doi: 10.7554/eLife.98747 (PMC11588336; doi:10.7554/eLife.98747)
Supplement: Figure 1—figure supplement 1—source data 1. [file elife-98747-fig1-figsupp1-data1.xlsx]

## Sheet: Panel a
Day 7	Looking at ducts					Day 7	Looking at ducts
Measuring whether I can observe the release of sebum. Bursting sebocytes						Measuring whether I can observe the release of sebum. Bursting sebocytes
	bursting seb						bursting seb
aRW	Yes	No	Total	Yes%		aJAG1	Yes	No	Total	Yes%
1-1	12	6	18	0.666667		2-6	14	12	26	0.538462		t.test	0.661872
1-2	5	4	9	0.555556		2-7	2	4	6	0.333333		tdist	0.537333
1-3	4	7	11	0.363636		2-8	8	6	14	0.571429
1-4	15	9	24	0.625		2-9	7	6	13	0.538462
1-5	2	2	4	0.5		2-10	4	3	7	0.571429
Average			66	0.542172		Average			66	0.510623
stdev				0.118524		stdev				0.100469
sem				0.0530056		sem				0.0449312
Day 7	Looking at ducts					Day 7	Looking at ducts
Measuring whether I can observe the release of sebum. Bursting sebocytes						Measuring whether I can observe the release of sebum. Bursting sebocytes
	bursting seb						bursting seb
aJAG2	Yes	No	Total	Yes%		aJ1J2	Yes	No	Total	Yes%
3-11	17	9	26	0.653846		4-16	3	3	6	0.5
3-12	5	9	14	0.357143		4-17	4	5	9	0.444444
3-13	7	4	11	0.636364		4-18	7	6	13	0.538462
3-14	6	4	10	0.6		4-19	3	5	8	0.375
3-15	4	3	7	0.571429		4-20	5	6	11	0.454545
Average			68	0.563756		Average			47	0.46249
stdev				0.119843		stdev				0.0616886
sem				0.0535955		sem				0.027588
			t.test	0.78189					t.test	0.219098
			tdist	0.469668					tdist	0.835237
