# Supplementary material for: The Jag2/Notch1 signaling axis promotes sebaceous gland differentiation and controls progenitor proliferation
Source: eLife. 2024 Nov 25;13:RP98747. doi: 10.7554/eLife.98747 (PMC11588336; doi:10.7554/eLife.98747)
Supplement: Figure 1—source data 1. [file elife-98747-fig1-data1.xlsx]

## Sheet: Panel d
Day 7
aRW	Proper SG	Mix of some sebocytes and some epithelial cells?	Could not see any sebocytes	Total	proper SG %	mixed SG %	SG with only epithelial cells %	Total %	Proper SG	Mixed SG	No sebocyte SG			Proper SG	Mixed SG	No sebocyte SG
1	80	6	4	90	0.888889	0.0666667	0.0444444	1	0.925266	0.051527	0.0232074		aRW	0.925266	0.051527	0.0232074
2	82	3	1	86	0.953488	0.0348837	0.0116279	1					aN1	0.0342834	0.516593	0.449124
3	77	5	2	84	0.916667	0.0595238	0.0238095	1					aN2	0.898444	0.0693276	0.0322282
4	77	3	1	81	0.950617	0.037037	0.0123457	1					aN1N2	0.00943396	0.225285	0.765282
5	77	5	2	84	0.916667	0.0595238	0.0238095	1
Average	393	22	10	425	0.925266	0.051527	0.0232074
stdev					0.026974	0.0145264	0.0132646
sem					0.0120631	0.0064964	0.00593211
aN1	Proper SG	Mix of some sebocytes and some epithelial cells?	Could not see any sebocytes	Total	proper SG %	mixed SG %	SG with only epithelial cells %	Total %	Proper SG	Mixed SG	No sebocyte SG
11	4	35	20	59	0.0677966	0.59322	0.338983	1	0.0342834	0.516593	0.449124
12	4	34	21	59	0.0677966	0.576271	0.355932	1
13	0	29	34	63	0	0.460317	0.539683	1
14	1	26	44	71	0.0140845	0.366197	0.619718	1
15	1	27	18	46	0.0217391	0.586957	0.391304	1
Average	10	151	137	298	0.0342834	0.516593	0.449124
stdev					0.0315713	0.100212	0.123958
sem					0.0141191	0.0448163	0.0554356
aN2	Proper SG	Mix of some sebocytes and some epithelial cells?	Could not see any sebocytes	Total	proper SG %	mixed SG %	SG with only epithelial cells %	Total %	Proper SG	Mixed SG	No sebocyte SG
16	62	7	1	70	0.885714	0.1	0.0142857	1	0.898444	0.0693276	0.0322282
17	62	4	1	67	0.925373	0.0597015	0.0149254	1
18	61	4	2	67	0.910448	0.0597015	0.0298507	1
19	65	6	3	74	0.878378	0.0810811	0.0405405	1
20	58	3	4	65	0.892308	0.0461538	0.0615385	1
Average	308	24	11	343	0.898444	0.0693276	0.0322282
stdev					0.0191807	0.0212208	0.0197178
sem					0.00857787	0.00949022	0.00881805
aN1N2	Proper SG	Mix of some sebocytes and some epithelial cells?	Could not see any sebocytes	Total	proper SG %	mixed SG %	SG with only epithelial cells %	Total %	Proper SG	Mixed SG	No sebocyte SG
21	0	3	30	33	0	0.0909091	0.909091	1	0.00943396	0.225285	0.765282
22	0	11	47	58	0	0.189655	0.810345	1
23	2	22	29	53	0.0377358	0.415094	0.54717	1
25	0	15	58	73	0	0.205479	0.794521	1
Average	2	51	164	217	0.00943396	0.225285	0.765282
stdev					0.0188679	0.136316	0.153991
sem					0.00943396	0.068158	0.0769954
Chi square test
		observed						observed						observed
	Proper SG	Mixed SG	No sebocyte SG	total			Proper SG	Mixed SG	No sebocyte SG	total			Proper SG	Mixed SG	No sebocyte SG	total
aRW	393	22	10	425		aRW	393	22	10	425		aRW	393	22	10	425
aN1	10	151	137	298		aN2	308	24	11	343		aN1N2	2	51	164	217
total	403	173	147	723		total	701	46	21	768		total	395	73	174	642
		expected						expected						expected
	Proper SG	Mixed SG	No sebocyte SG	total			Proper SG	Mixed SG	No sebocyte SG	total			Proper SG	Mixed SG	No sebocyte SG	total
aRW	236.895	101.694	86.4108			aRW	387.923	25.4557	11.6211			aRW	261.488	48.3255	115.187
aN1	166.105	71.3057	60.5892			aN2	313.077	20.5443	9.37891			aN1N2	133.512	24.6745	58.8131
2.01956e-123						0.426238						3.84725e-114

## Sheet: Panel g
Day 3																				Day 7
aRW	Proper SG	Mix of some sebocytes and some epithelial cells?	Could not see any sebocytes	Total	proper SG %	mixed SG %	SG with only epithelial cells %	Total %	Proper SG	Mixed SG	No sebocyte SG			Proper SG	Mixed SG	No sebocyte SG				aRW	Proper SG	Mix of some sebocytes and some epithelial cells?	Could not see any sebocytes	Total	proper SG %	mixed SG %	SG with only epithelial cells %	Total %	Proper SG	Mixed SG	No sebocyte SG			Proper SG	Mixed SG	No sebocyte SG
1-1	119	7	4	130	0.915385	0.0538462	0.0307692	1	0.895611	0.0650434	0.0393454		aRW	0.895611	0.0650434	0.0393454				1-1	93	6	2	101	0.920792	0.0594059	0.019802	1	0.923837	0.0604216	0.0157418		aRW	0.923837	0.0604216	0.0157418
1-2	150	5	5	160	0.9375	0.03125	0.03125	1					aJAG1	0.903793	0.067959	0.0282482				1-2	95	5	1	101	0.940594	0.049505	0.00990099	1					aJAG1	0.881272	0.0812067	0.0375213
1-3	153	19	11	183	0.836066	0.103825	0.0601093	1					aJAG2	0.837858	0.106442	0.0556998				1-3	87	6	1	94	0.925532	0.0638298	0.0106383	1					aJAG2	0.0332062	0.468124	0.49867
1-4	138	13	9	160	0.8625	0.08125	0.05625	1												1-4	110	6	3	119	0.92437	0.0504202	0.0252101	1					aJ1J2	0.0281753	0.376552	0.595273
1-5	202	12	4	218	0.926606	0.0550459	0.0183486	1												1-5	69	6	1	76	0.907895	0.0789474	0.0131579	1
Average	762	56	33	851	0.895611	0.0650434	0.0393454													Average	454	29	8	491	0.923837	0.0604216	0.0157418
stdev					0.0440123	0.0279911	0.0180059													stdev					0.0116981	0.0119901	0.00657592
sem					0.0196829	0.012518	0.0080525													sem					0.00523155	0.00536215	0.00294084
aJAG1	Proper SG	Mix of some sebocytes and some epithelial cells?	Could not see any sebocytes	Total	proper SG %	mixed SG %	SG with only epithelial cells %	Total %	Proper SG	Mixed SG	No sebocyte SG									aJAG1	Proper SG	Mix of some sebocytes and some epithelial cells?	Could not see any sebocytes	Total	proper SG %	mixed SG %	SG with only epithelial cells %	Total %	Proper SG	Mixed SG	No sebocyte SG
2-6	139	11	7	157	0.88535	0.0700637	0.044586	1	0.903793	0.067959	0.0282482									2-6	113	8	1	122	0.92623	0.0655738	0.00819672	1	0.881272	0.0812067	0.0375213
2-7	185	13	5	203	0.91133	0.0640394	0.0246305	1												2-7	77	8	3	88	0.875	0.0909091	0.0340909	1
2-8	168	12	5	185	0.908108	0.0648649	0.027027	1												2-8	91	8	5	104	0.875	0.0769231	0.0480769	1
2-9	188	13	5	206	0.912621	0.0631068	0.0242718	1												2-9	77	11	5	93	0.827957	0.11828	0.0537634	1
2-10	174	15	4	193	0.901554	0.0777202	0.0207254	1												2-10	83	5	4	92	0.902174	0.0543478	0.0434783	1
Average	854	64	26	944	0.903793	0.067959	0.0282482													Average	441	40	18	499	0.881272	0.0812067	0.0375213
stdev					0.0111637	0.0060867	0.0094062													stdev					0.0366716	0.0247622	0.0179054
sem					0.00499255	0.00272205	0.00420658													sem					0.0164001	0.011074	0.00800753
aJAG2	Proper SG	Mix of some sebocytes and some epithelial cells?	Could not see any sebocytes	Total	proper SG %	mixed SG %	SG with only epithelial cells %	Total %	Proper SG	Mixed SG	No sebocyte SG									aJAG2	Proper SG	Mix of some sebocytes and some epithelial cells?	Could not see any sebocytes	Total	proper SG %	mixed SG %	SG with only epithelial cells %	Total %	Proper SG	Mixed SG	No sebocyte SG
3-11	156	19	7	182	0.857143	0.104396	0.0384615	1	0.837858	0.106442	0.0556998									3-11	6	49	41	96	0.0625	0.510417	0.427083	1	0.0332062	0.468124	0.49867
3-12	123	17	6	146	0.842466	0.116438	0.0410959	1												3-12	1	26	39	66	0.0151515	0.393939	0.590909	1
3-13	122	16	11	149	0.818792	0.107383	0.0738255	1												3-13	1	35	30	66	0.0151515	0.530303	0.454545	1
3-14	94	14	9	117	0.803419	0.119658	0.0769231	1												3-14	5	31	47	83	0.060241	0.373494	0.566265	1
3-15	144	14	8	166	0.86747	0.0843373	0.0481928	1												3-15	1	41	35	77	0.012987	0.532468	0.454545	1
Average	639	80	41	760	0.837858	0.106442	0.0556998													Average	14	182	192	388	0.0332062	0.468124	0.49867
stdev					0.0265498	0.0138589	0.0183423													stdev					0.0257379	0.0778672	0.0743232
sem					0.0118734	0.00619791	0.00820291													sem					0.0115104	0.0348233	0.0332383
Chi square test																				aJ1J2	Proper SG	Mix of some sebocytes and some epithelial cells?	Could not see any sebocytes	Total	proper SG %	mixed SG %	SG with only epithelial cells %	Total %	Proper SG	Mixed SG	No sebocyte SG
		Observed						Observed												4-16	1	34	57	92	0.0108696	0.369565	0.619565	1	0.0281753	0.376552	0.595273
	Proper SG	Mixed SG	No sebocyte SG	total			Proper SG	Mixed SG	No sebocyte SG	total										4-17	1	28	57	86	0.0116279	0.325581	0.662791	1
aRW	762	56	33	851		aRW	762	56	33	851										4-18	1	36	52	89	0.011236	0.404494	0.58427	1
aJAG1	854	64	26	944		aJAG2	639	80	41	760										4-19	9	36	39	84	0.107143	0.428571	0.464286	1
total	1616	120	59	1795		total	1401	136	74	1611										4-20	0	39	71	110	0	0.354545	0.645455	1
																				Average	12	173	276	461	0.0281753	0.376552	0.595273
																				stdev					0.0444127	0.0406752	0.078971
																				sem					0.019862	0.0181905	0.0353169
		Expected						Expected
	Proper SG	Mixed SG	No sebocyte SG				Proper SG	Mixed SG	No sebocyte SG
aRW	766.137	56.8914	27.9716			aRW	740.069	71.8411	39.09
aJAG1	849.863	63.1086	31.0284			aJAG2	660.931	64.1589	34.91
																				Chi square test
																						observed						observed						observed
0.409041						0.00453236															Proper SG	Mixed SG	No sebocyte SG	total			Proper SG	Mixed SG	No sebocyte SG	total			Proper SG	Mixed SG	No sebocyte SG	total
																				aRW	454	29	8	491		aRW	454	29	8	491		aRW	454	29	8	491
																				aJAG1	441	40	18	499		aJAG2	14	182	192	388		aJ1J2	12	173	276	461
																				total	895	69	26	990		total	468	211	200	879		total	466	202	284	952
																						expected						expected						expected
																					Proper SG	Mixed SG	No sebocyte SG	total			Proper SG	Mixed SG	No sebocyte SG	total			Proper SG	Mixed SG	No sebocyte SG	total
																				aRW	443.884	34.2212	12.8949			aRW	261.42	117.862	111.718			aRW	240.342	104.183	146.475
																				aJAG1	451.116	34.7788	13.1051			aJAG2	206.58	93.1377	88.2821			aJ1J2	225.658	97.8172	137.525
																				0.0571449						7.61157e-151						6.23073e-169
