# Supplementary material for: The Jag2/Notch1 signaling axis promotes sebaceous gland differentiation and controls progenitor proliferation
Source: eLife. 2024 Nov 25;13:RP98747. doi: 10.7554/eLife.98747 (PMC11588336; doi:10.7554/eLife.98747)
Supplement: Figure 2—figure supplement 1—source data 1. [file elife-98747-fig2-figsupp1-data1.xlsx]

## Sheet: Panel a, b, c
aRW								Percentage
N1ICD+ve location		B	B/M	M	M/T	T	total	B	B/M	M	M/T	T
T,T,M/T,M,M,B,B,B		3	0	2	1	2	8	0.375	0	0.25	0.125	0.25
B,B,B,B/M, M,M/T,T		3	1	1	1	1	7	0.428571	0.142857	0.142857	0.142857	0.142857
B, M		1	0	1	0	0	2	0.5	0	0.5	0	0
T, 2 T/M, M		0	0	1	2	1	4	0	0	0.25	0.5	0.25
B, B/M, M		1	1	1	0	0	3	0.333333	0.333333	0.333333	0	0
B, B, B, B/M, T		3	1	0	0	1	5	0.6	0.2	0	0	0.2
B, B/M, M		1	1	1	0	0	3	0.333333	0.333333	0.333333	0	0
B,B,B,B,M,T		4	0	1	0	1	6	0.666667	0	0.166667	0	0.166667
B, B/M, M,M		1	1	2	0	0	4	0.25	0.25	0.5	0	0
B/M,T,T T		0	1	0	0	3	4	0	0.25	0	0	0.75
B,B,B/M, M		2	1	1	0	0	4	0.5	0.25	0.25	0	0
B,B,M,M,M/T		2	0	2	1	0	5	0.4	0	0.4	0.2	0
B, B, B, B/M, M		3	1	1	0	0	5	0.6	0.2	0.2	0	0
							avg	0.383608	0.150733	0.255861	0.0744505	0.135348
							std	0.208256	0.13378	0.159913	0.145481	0.211648
							sem	0.0577599	0.037104	0.0443519	0.0403491	0.0587006
aJ1								Percentage
N1ICD+ve location		B	B/M	M	M/T	T	total	B	B/M	M	M/T	T
B, M, M/T, T		1	0	1	1	1	4	0.25	0	0.25	0.25	0.25
B, B/M, M		1	1	1	0	0	3	0.333333	0.333333	0.333333	0	0
B,B, B/M,B/M, M, M/T		2	2	1	1	0	6	0.333333	0.333333	0.166667	0.166667	0
B, B/M, B/M, M, M		1	2	2	0	0	5	0.2	0.4	0.4	0	0
B, B/M, T, T		1	1	0	0	2	4	0.25	0.25	0	0	0.5
B, M, T		1	0	1	0	1	3	0.333333	0	0.333333	0	0.333333
B, B/M, M/T, T		1	1	0	1	1	4	0.25	0.25	0	0.25	0.25
B,M,T,T		1	0	1	0	2	4	0.25	0	0.25	0	0.5
B,B,M,T		2	0	1	0	1	4	0.5	0	0.25	0	0.25
B,M,M		1	0	2	0	0	3	0.333333	0	0.666667	0	0
B,B,B/M,M		2	1	1	0	0	4	0.5	0.25	0.25	0	0
B,B,M,M/T,T		2	0	1	1	1	5	0.4	0	0.2	0.2	0.2
B,B/M,M,T		1	1	1	0	1	4	0.25	0.25	0.25	0	0.25
B,B,M,M/T,T		2	0	1	1	1	5	0.4	0	0.2	0.2	0.2
B,B,B,B/M,B/M, M,M, T		3	2	2	0	1	8	0.375	0.25	0.25	0	0.125
							avg	0.330556	0.154444	0.253333	0.0711111	0.190556
							std	0.0920267	0.155133	0.157384	0.105873	0.171561
							sem	0.0237612	0.0400551	0.0406365	0.0273362	0.0442969
aJ2								Percentage
N1ICD+ve location		B	B/M	M	M/T	T	total	B	B/M	M	M/T	T
		0	0	0	0	0	0	0	0	0	0	0
		0	0	0	0	0	0	0	0	0	0	0
		0	0	0	0	0	0	0	0	0	0	0
		0	0	0	0	0	0	0	0	0	0	0
		0	0	0	0	0	0	0	0	0	0	0
		0	0	0	0	0	0	0	0	0	0	0
		0	0	0	0	0	0	0	0	0	0	0
		0	0	0	0	0	0	0	0	0	0	0
		0	0	0	0	0	0	0	0	0	0	0
		0	0	0	0	0	0	0	0	0	0	0
		0	0	0	0	0	0	0	0	0	0	0
		0	0	0	0	0	0	0	0	0	0	0
		0	0	0	0	0	0	0	0	0	0	0
		0	0	0	0	0	0	0	0	0	0	0
B		1	0	0	0	0	1	1	0	0	0	0
							avg	0.0666667	0	0	0	0
							std	0.258199	0	0	0	0
							sem	0.0666667	0	0	0	0

## Sheet: Panel d
aRW	total basal cells	both	%		aJ1	total basal cells	both	%		aJ2	total basal cells	both	%
1	9	7	0.777778		1	7	6	0.857143		1	10	9	0.9
2	8	8	1		2	7	7	1		2	7	7	1
3	7	6	0.857143		3	9	8	0.888889		3	9	8	0.888889
4	10	10	1		4	10	9	0.9		4	9	9	1
5	11	10	0.909091		5	7	7	1		5	7	6	0.857143
6	11	10	0.909091		6	8	8	1		6	7	6	0.857143
7	7	6	0.857143		7	7	5	0.714286		7	12	12	1
8	7	7	1		8	6	5	0.833333		8	8	6	0.75
9	7	6	0.857143		9	9	7	0.777778		9	8	6	0.75
10	7	7	1		10	12	11	0.916667		10	7	5	0.714286
11	7	7	1		11	10	10	1		11	7	7	1
12	7	4	0.571429		12	11	10	0.909091		12	9	9	1
13	7	4	0.571429		13	9	9	1		13	7	7	1
avg	8.07692	7.07692	0.870019		14	11	11	1		14	9	9	1
stdev	1.60528	2.01914	0.15134		15	10	10	1		15	13	13	1
sem	0.445224	0.560008	0.0419743		avg	8.86667	8.2	0.919812		avg	8.6	7.93333	0.914497
					stdev	1.80739	2.00713	0.0926997		stdev	1.88225	2.28244	0.106949
					sem	0.466667	0.518239	0.0239349		sem	0.485994	0.589323	0.0276142
					t.test	0.296268				t.test	0.372485
						0.771705					0.715534

## Sheet: Panel g
Day 7	Looking at IFE			Day 7	Looking at IFE			Day 7	Looking at IFE			Day 7	Looking at IFE
Measuring width of tissue				Measuring width of tissue				Measuring width of tissue				Measuring width of tissue
	aRW	Width (pixels)	Width (um)		aJ1	Width	um		aJ2	Width	um		aJ1J2	Width	um
1	5	0.359	15.8464	1	10	0.338	14.9194	1	15	0.33	14.5663	1	20	0.317	13.9925
2		0.344	15.1843	2		0.312	13.7718	2		0.354	15.6257	2		0.31	13.6835
3	4	0.354	15.6257	3		0.286	12.6241	3		0.29	12.8007	3		0.298	13.1538
4		0.323	14.2573	4	9	0.316	13.9484	4	14	0.333	14.6987	4		0.295	13.0214
5		0.39	17.2147	5		0.27	11.9179	5		0.333	14.6987	5		0.345	15.2284
6		0.285	12.58	6		0.332	14.6546	6		0.34	15.0077	6		0.339	14.9636
7		0.365	16.1112	7		0.323	14.2573	7		0.303	13.3745	7	19	0.324	14.3015
8		0.292	12.889	8		0.359	15.8464	8	13	0.327	14.4339	8		0.353	15.5816
9		0.324	14.3015	9		0.336	14.8312	9		0.353	15.5816	9		0.346	15.2726
10		0.313	13.8159	10		0.37	16.3319	10		0.369	16.2878	10		0.334	14.7429
11		0.337	14.8753	11	8	0.311	13.7277	11		0.308	13.5952	11	18	0.321	14.1691
12	3	0.302	13.3304	12		0.336	14.8312	12	12	0.313	13.8159	12		0.356	15.714
13		0.302	13.3304	13		0.298	13.1538	13		0.28	12.3593	13		0.298	13.1538
14		0.323	14.2573	14		0.28	12.3593	14		0.329	14.5222	14		0.302	13.3304
15		0.313	13.8159	15		0.341	15.0519	15		0.323	14.2573	15		0.358	15.8023
16	2	0.344	15.1843	16	7	0.356	15.714	16		0.313	13.8159	16	17	0.317	13.9925
17		0.338	14.9194	17		0.341	15.0519	17		0.321	14.1691	17		0.345	15.2284
18		0.303	13.3745	18		0.293	12.9331	18	11	0.28	12.3593	18		0.365	16.1112
19		0.295	13.0214	19		0.295	13.0214	19		0.307	13.5511	19		0.305	13.4628
20		0.303	13.3745	20	6	0.344	15.1843	20		0.285	12.58	20		0.323	14.2573
21	1	0.323	14.2573	21		0.277	12.2269	21		0.357	15.7581	21	16	0.304	13.4187
22		0.34	15.0077	22		0.311	13.7277	22		0.304	13.4187	22		0.264	11.6531
23		0.271	11.962	23		0.3	13.2421	23		0.303	13.3745	Average		0.323591
24		0.319	14.0808	24		0.308	13.5952	24		0.341	15.0519	stdev		0.0255709
25		0.277	12.2269	25		0.321	14.1691	25		0.365	16.1112	sem		0.00545174
26		0.333	14.6987	26		0.319	14.0808	26		0.314	13.8601
Average		0.322		27		0.292	12.889	27		0.29	12.8007
stdev		0.0283436		Average		0.317222		Average		0.320926
sem		0.00555864		stdev		0.0263633		stdev		0.0255266
				sem		0.00507363		sem		0.00491261
					t.test	0.5278			t.test	0.885222			t.test	0.840375
					tdist	0.604882			tdist	0.384151			tdist	0.409739

## Sheet: Panel h
Day 7	Looking at adipose tissue			Day 7	Looking at adipose tissue			Day 7	Looking at adipose tissue			Day 7	Looking at adipose tissue
Measuring width of tissue - widest point				Measuring width of tissue - widest point				Measuring width of tissue - widest point				Measuring width of tissue - widest point
	aRW	Width	um		aJ1	Width	um		aJ2	Width	um		aJ1J2	Width	um
1	1	3.262	143.986	1	9	3.189	140.764	1	15	3.335	147.208	1	20	2.292	101.17
2	1	3.073	135.643	2		3.677	162.304	2	14	2.875	126.904	2		3.385	149.415
3	1	3.47	153.167	3		3.324	146.723	3	14	2.698	119.091	3		3.906	172.412
4	1	2.607	115.074	4		2.938	129.684	4	13	3.011	132.907	4		3.292	145.31
5	1	3.844	169.676	5	8	2.667	117.722	5	13	3.156	139.307	5		3.649	161.068
6	2	3.229	142.529	6		2.896	127.831	6	12	3.417	150.828	6	18	2.938	129.684
7	2	3.428	151.313	7	7	3.292	145.31	7	12	3.595	158.685	7		3.469	153.123
8	2	3.188	140.719	8		3.979	175.635	8	12	3.635	160.45	8		3.907	172.456
9	3	3.074	135.687	9		3.886	171.529	9	12	3.865	170.603	9		3.188	140.719
10	3	3.314	146.281	10	6	3.001	132.465	10	12	3.521	155.418	10		3.386	149.459
11	4	3.948	174.266	11		3.126	137.983	11	12	3.931	173.516	11	17	2.75	121.386
12	4	3.678	162.348	12		3.345	147.65	12	11	3.167	139.793	12		2.704	119.356
13	5	3.302	145.752	13		3.823	168.749	13	11	3.104	137.012	13		2.625	115.868
Average		3.33977	147.419	Average		3.31869	146.488	14	11	3.303	145.796	14		3.042	134.275
stdev		0.351844	15.5305	stdev		0.412832	18.2226	15	11	3.354	148.047	15		3.407	150.386
sem		0.097584	4.30739	sem		0.114499	5.05403	Average		3.33113	147.037	Average		3.196	141.073
								stdev		0.345602	15.255	stdev		0.469764	20.7356
								sem		0.089234	3.93882	sem		0.130289	5.75101
					t.test	0.88975			t.test	0.948359			t.test	0.374051
					tdist	0.389769			tdist	0.360244			tdist	0.714396
