# Supplementary material for: The Jag2/Notch1 signaling axis promotes sebaceous gland differentiation and controls progenitor proliferation
Source: eLife. 2024 Nov 25;13:RP98747. doi: 10.7554/eLife.98747 (PMC11588336; doi:10.7554/eLife.98747)
Supplement: Figure 2—source data 1. [file elife-98747-fig2-data1.xlsx]

## Sheet: Panel g
aRW	total basal cells	N1ICD+ve	N1ICD%		aJ1	total basal cells	N1ICD+ve	N1ICD%		aJ2	total basal cells	N1ICD+ve	N1ICD%
1	9	8	0.888889		1	7	4	0.571429		1	10	0	0
2	8	7	0.875		2	7	3	0.428571		2	7	0	0
3	7	2	0.285714		3	9	6	0.666667		3	9	0	0
4	10	4	0.4		4	10	5	0.5		4	9	0	0
5	11	3	0.272727		5	7	4	0.571429		5	7	0	0
6	11	5	0.454545		6	8	3	0.375		6	7	0	0
7	7	3	0.428571		7	7	4	0.571429		7	12	0	0
8	7	6	0.857143		8	6	4	0.666667		8	8	0	0
9	7	4	0.571429		9	9	4	0.444444		9	8	0	0
10	7	4	0.571429		10	12	3	0.25		10	7	0	0
11	7	4	0.571429		11	10	4	0.4		11	7	0	0
12	7	5	0.714286		12	11	5	0.454545		12	9	0	0
13	7	5	0.714286		13	9	4	0.444444		13	7	0	0
avg			0.585034		14	11	5	0.454545		14	9	0	0
std			0.213559		15	10	8	0.8		15	13	1	0.0769231
sem			0.0592307		avg			0.506611		avg			0.00512821
					std			0.137253		std			0.0198615
					sem			0.0354386		sem			0.00512821

## Sheet: Panel k
aRW	N1ICD+ve	both	onlyN1	onlyJ2	both%	onlyN1%	onlyJ2%			aJ1	N1ICD+ve	both	onlyN1	onlyJ2	both%	onlyN1%	onlyJ2%
1	8	6	0	1	0.75	0	0.125			1	4	3	0	1	0.75	0	0.25
2	7	7	0	0	1	0	0			2	3	3	0	0	1	0	0
3	2	2	0	0	1	0	0			3	6	6	0	0	1	0	0
4	4	4	0	0	1	0	0			4	5	5	0	0	1	0	0
5	3	3	0	0	1	0	0			5	4	4	0	0	1	0	0
6	5	5	0	0	1	0	0			6	3	3	0	0	1	0	0
7	3	3	0	0	1	0	0			7	4	3	0	1	0.75	0	0.25
8	6	6	0	0	1	0	0			8	4	3	0	1	0.75	0	0.25
9	4	4	0	0	1	0	0			9	4	4	0	0	1	0	0
10	4	4	0	0	1	0	0			10	3	3	0	0	1	0	0
11	4	4	0	0	1	0	0			11	4	4	0	0	1	0	0
12	5	4	1	0	0.8	0.2	0			12	5	5	0	0	1	0	0
13	5	4	1	0	0.8	0.2	0			13	4	4	0	0	1	0	0
avg					0.95	0.0307692	0.00961538			14	5	5	0	0	1	0	0
std					0.0957427	0.0751068	0.0346688			15	8	8	0	0	1	0	0
sem					0.0265543	0.0208309	0.00961538			avg					0.95	0	0.05
										std					0.10351	0	0.10351
										sem					0.0267261	0	0.0267261
aJ2	N1ICD+ve	both	onlyN1	onlyJ2	both%	onlyN1%	onlyJ2%
1	0	0	0	0	0	0	0
2	0	0	0	0	0	0	0
3	0	0	0	0	0	0	0
4	0	0	0	0	0	0	0
5	0	0	0	0	0	0	0
6	0	0	0	0	0	0	0
7	0	0	0	0	0	0	0
8	0	0	0	0	0	0	0
9	0	0	0	0	0	0	0
10	0	0	0	0	0	0	0
11	0	0	0	0	0	0	0
12	0	0	0	0	0	0	0
13	0	0	0	0	0	0	0
14	0	0	0	0	0	0	0
15	1	1	0	0	1	0	0
avg					1	0	0
std					0	0	0
sem					0	0	0
