# Supplementary material for: The Jag2/Notch1 signaling axis promotes sebaceous gland differentiation and controls progenitor proliferation
Source: eLife. 2024 Nov 25;13:RP98747. doi: 10.7554/eLife.98747 (PMC11588336; doi:10.7554/eLife.98747)
Supplement: Figure 3—source data 1. [file elife-98747-fig3-data1.xlsx]

## Sheet: Panel h
3d
aRW	sebocytes expressing mature markers			aJ1	sebocytes expressing mature markers			aJ2	sebocytes expressing mature markers
1	11			1	4			1	4
2	5			2	6			2	5
3	4			3	5			3	1
4	6			4	4			4	2
5	10			5	6			5	5
6	10			6				6	5
7	5			7	6			7	11
8	5			8	7			8	3
9	9			9	6			9	5
10	6			10	7			10	1
11	5			11	5			11	8
12	7			12	5			12	1
13	3			13	10			13	0
14	4			14	7			14	3
15	11			15	8			15	6
16	3			avg	6.14286			16	1
17	5			std	1.61041			17	6
avg	6.41176			sem	0.415805			18	9
std	2.73995							19	9
sem	0.664537							20	4
				t.test	0.748631			21	10
				tdist	0.465657			22	9
								23	2
								24	1
								25	7
								26	7
								27	7
								28	0
								29	6
								30	1
								avg	4.63333
								std	3.2322
								sem	0.590117
								t.test	0.0624423
								tdist	0.950939

## Sheet: Panel i
7d
aRW	sebocytes expressing mature markers			aJ1	sebocytes expressing mature markers			aJ2	sebocytes expressing mature markers			aJ1J2	sebocytes expressing mature markers
1	6			1	6			1	1			1	1
2	8			2	6			2	1			2	0
3	8			3	7			3	1			3	1
4	7			4	6			4	0			4	0
5	7			5	9			5	2			5	0
6	11			6	6			6	1			6	1
7	10			7	4			7	1			7	1
8	5			8	6			8	0			8	0
9	7			9	8			9	1			9	0
10	8			10	4			10	0			10	0
11	10			11	6			11	3			11	0
12	4			12	4			12	0			12	0
13	4			13	4			13	1			13	0
14	4			14	5			14	0			14	0
15	4			15	7			15	0			15	0
16	8			16	7			16	0			16	0
17	4			17	7			17	0			17	1
18	9			18	9			18	1			18	1
avg	6.88889			19	7			19	1			19	0
std	2.32351			avg	6.21053			20	1			20	0
sem	0.547656			std	1.54844			21	1			21	0
				sem	0.346241			22	1			avg	0.285714
								avg	0.772727			std	0.46291
								std	0.751622			sem	0.101015
				t.test	0.300744			sem	0.160246
				tdist	0.767056
								t.test	4.12632e-14			t.test	4.06238e-15
								tdist	1			tdist	1
