# Supplementary material for: The Jag2/Notch1 signaling axis promotes sebaceous gland differentiation and controls progenitor proliferation
Source: eLife. 2024 Nov 25;13:RP98747. doi: 10.7554/eLife.98747 (PMC11588336; doi:10.7554/eLife.98747)
Supplement: Figure 4—source data 1. [file elife-98747-fig4-data1.xlsx]

## Sheet: Panel d and e
3 days
aRW	#of Lrig1+AR+ cells	Lrig1+only	total Lrig+	#of Lrig1+AR+ cells	Lrig1+only		aJ1	#of Lrig1+AR+ cells	Lrig1+only	total Lrig+	#of Lrig1+AR+ cells	Lrig1+only		aJ2	#of Lrig1+AR+ cells	Lrig1+only	total Lrig+	#of Lrig1+AR+ cells	Lrig1+only
1	3	3	6	0.5	0.5		1	2	4	6	0.333333	0.666667		1	1	5	6	0.166667	0.833333
2	4	4	8	0.5	0.5		2	2	3	5	0.4	0.6		2	3	4	7	0.428571	0.571429
3	2	4	6	0.333333	0.666667		3	3	3	6	0.5	0.5		3	3	2	5	0.6	0.4
4	4	4	8	0.5	0.5		4	2	3	5	0.4	0.6		4	3	4	7	0.428571	0.571429
5	1	4	5	0.2	0.8		5	3	4	7	0.428571	0.571429		5	3	3	6	0.5	0.5
6	3	4	7	0.428571	0.571429		6	2	7	9	0.222222	0.777778		6	3	2	5	0.6	0.4
7	3	7	10	0.3	0.7		7	4	4	8	0.5	0.5		7	3	2	5	0.6	0.4
8	4	3	7	0.571429	0.428571		8	2	4	6	0.333333	0.666667		8	5	3	8	0.625	0.375
9	3	6	9	0.333333	0.666667		9	4	3	7	0.571429	0.428571		9	5	4	9	0.555556	0.444444
10	4	5	9	0.444444	0.555556		10	2	8	10	0.2	0.8		10	4	3	7	0.571429	0.428571
11	3	6	9	0.333333	0.666667		avg	2.6	4.3	6.9	0.388889	0.611111		11	4	2	6	0.666667	0.333333
12	3	5	8	0.375	0.625		std	0.843274	1.76698	1.66333	0.119937	0.119937		12	3	4	7	0.428571	0.571429
13	6	4	10	0.6	0.4		sem	0.266667	0.558768	0.525991	0.0379273	0.0379273		13	5	7	12	0.416667	0.583333
14	3	4	7	0.428571	0.571429									14	6	5	11	0.545455	0.454545
15	2	5	7	0.285714	0.714286									15	5	6	11	0.454545	0.545455
16	2	5	7	0.285714	0.714286		t.test	0.151618		t.test	0.788817	0.788817		16	3	3	6	0.5	0.5
17	4	6	10	0.4	0.6		tdist	0.882504		tdist	0.448516	0.448516		17	2	3	5	0.4	0.6
avg	3.17647	4.64706	7.82353	0.401144	0.598856									18	2	5	7	0.285714	0.714286
std	1.13111	1.11474	1.50977	0.109845	0.109845									19	7	1	8	0.875	0.125
sem	0.274335	0.270364	0.366174	0.0266413	0.0266413									20	5	5	10	0.5	0.5
														21	2	5	7	0.285714	0.714286
														22	3	6	9	0.333333	0.666667
														23	4	4	8	0.5	0.5
														24	4	1	5	0.8	0.2
														avg	3.66667	3.70833	7.375	0.502811	0.497189
														std	1.40393	1.60106	2.06023	0.158681	0.158681
														sem	0.286576	0.326816	0.420544	0.0323907	0.0323907
														t.test	0.450024		t.test	0.0282065	0.0282065
														tdist	0.658379		tdist	0.977826	0.977826

## Sheet: Panel h and i
7 days
aRW	#of Lrig1+AR+ cells	Lrig1+only	total Lrig+	#of Lrig1+AR+ cells	Lrig1+only		aJ1	#of Lrig1+AR+ cells	Lrig1+only	total Lrig+	#of Lrig1+AR+ cells	Lrig1+only		aJ2	#of Lrig1+AR+ cells	Lrig1+only	total Lrig+	#of Lrig1+AR+ cells	Lrig1+only		aJ1J2	#of Lrig1+AR+ cells	Lrig1+only	total Lrig+	#of Lrig1+AR+ cells	Lrig1+only
1	3	4	7	0.428571	0.571429		1	4	4	8	0.5	0.5		1	9	4	13	0.692308	0.307692		1	2	13	15	0.133333	0.866667
2	4	4	8	0.5	0.5		2	2	4	6	0.333333	0.666667		2	11	6	17	0.647059	0.352941		2	10	15	25	0.4	0.6
3	3	4	7	0.428571	0.571429		3	4	5	9	0.444444	0.555556		3	14	9	23	0.608696	0.391304		3	10	16	26	0.384615	0.615385
4	4	5	9	0.444444	0.555556		4	3	5	8	0.375	0.625		4	11	2	13	0.846154	0.153846		4	5	15	20	0.25	0.75
5	5	2	7	0.714286	0.285714		5	3	7	10	0.3	0.7		5	12	8	20	0.6	0.4		5	14	14	28	0.5	0.5
6	4	4	8	0.5	0.5		6	3	10	13	0.230769	0.769231		6	10	4	14	0.714286	0.285714		6	25	17	42	0.595238	0.404762
7	4	3	7	0.571429	0.428571		7	2	4	6	0.333333	0.666667		7	4	13	17	0.235294	0.764706		7	18	7	25	0.72	0.28
8	3	6	9	0.333333	0.666667		8	1	6	7	0.142857	0.857143		8	10	6	16	0.625	0.375		8	2	8	10	0.2	0.8
9	4	5	9	0.444444	0.555556		9	4	3	7	0.571429	0.428571		9	14	10	24	0.583333	0.416667		9	3	16	19	0.157895	0.842105
10	4	6	10	0.4	0.6		10	5	4	9	0.555556	0.444444		10	8	16	24	0.333333	0.666667		10	2	10	12	0.166667	0.833333
11	2	4	6	0.333333	0.666667		11	4	6	10	0.4	0.6		11	17	13	30	0.566667	0.433333		11	7	6	13	0.538462	0.461538
12	4	5	9	0.444444	0.555556		12	3	4	7	0.428571	0.571429		12	10	6	16	0.625	0.375		12	17	10	27	0.62963	0.37037
avg	3.66667	4.33333	8	0.461905	0.538095		avg	3.16667	5.16667	8.33333	0.384608	0.615392		13	6	17	23	0.26087	0.73913		13	3	10	13	0.230769	0.769231
std	0.778499	1.1547	1.20605	0.103846	0.103846		std	1.11464	1.89896	2.01509	0.12714	0.12714		14	8	8	16	0.5	0.5		14	7	19	26	0.269231	0.730769
sem	0.224733	0.333333	0.348155	0.0299778	0.0299778		sem	0.321769	0.548183	0.581708	0.036702	0.036702		15	19	14	33	0.575758	0.424242		15	10	18	28	0.357143	0.642857
														16	9	6	15	0.6	0.4		16	2	14	16	0.125	0.875
														17	6	10	16	0.375	0.625		avg	8.5625	13	21.5625	0.353624	0.646376
							t.test	0.627809		t.test	0.117099			18	2	10	12	0.166667	0.833333		std	6.91827	4.01663	8.35838	0.192893	0.192893
							tdist	0.541892		tdist	0.908719			avg	10	9	19	0.530857	0.469143		sem	1.72957	1.00416	2.08959	0.0482233	0.0482233
														std	4.27028	4.27028	5.97052	0.182977	0.182977
														sem	1.00651	1.00651	1.40726	0.0431281	0.0431281
																						t.test	7.88188e-06		t.test	0.0906005
																						tdist	0.999994		tdist	0.929305
														t.test	9.059e-07		t.test	0.247736
														tdist	0.999999		tdist	0.808527

## Sheet: Panel l
7 days
aRW	#ofKi67+ve basal cells		aJ1	#ofKi67+ve basal cells		aJ2	#ofKi67+ve basal cells
1	6		1	4		1	6
2	4		2	2		2	12
3	2		3	4		3	5
4	3		4	7		4	3
5	3		5	3		5	8
6	4		6	4		6	3
7	3		7	4		7	7
8	5		8	4		8	11
9	6		9	3		9	6
10	7		10	4		10	6
11	3		11	4		11	4
avg	4.18182		12	4		12	3
std	1.60114		avg	3.91667		13	8
sem	0.482761		std	1.1645		14	10
			sem	0.336162		15	13
						16	9
						avg	7.125
						std	3.22232
						sem	0.80558
			t.test	0.65229		t.test	0.00994684
			tdist	0.52761		tdist	0.992242
