# Supplementary material for: The Jag2/Notch1 signaling axis promotes sebaceous gland differentiation and controls progenitor proliferation
Source: eLife. 2024 Nov 25;13:RP98747. doi: 10.7554/eLife.98747 (PMC11588336; doi:10.7554/eLife.98747)
Supplement: Figure 5—figure supplement 1—source data 1. [file elife-98747-fig5-figsupp1-data1.xlsx]

## Sheet: Panel d
aRW 7d				aJ1 7d				aJ2 7d				aJ1J2 7d
	#N1ICD/SG	total scs	%		#N1ICD/SG	total scs	%		#N1ICD/SG	total scs	%		#N1ICD/SG	total scs	%
1	4	10	0.4	1	4	9	0.444444	1	5	18	0.277778	1	3	25	0.12
2	9	13	0.692308	2	4	9	0.444444	2	5	19	0.263158	2	2	29	0.0689655
3	7	11	0.636364	3	6	14	0.428571	3	2	14	0.142857	3	6	45	0.133333
4	4	9	0.444444	4	8	13	0.615385	4	4	25	0.16	4	5	27	0.185185
5	5	8	0.625	5	2	9	0.222222	5	4	23	0.173913	5	2	18	0.111111
6	5	9	0.555556	6	7	14	0.5	6	4	16	0.25	6	7	42	0.166667
7	6	9	0.666667	7	12	17	0.705882	7	9	23	0.391304	7	8	47	0.170213
8	5	10	0.5	8	8	15	0.533333	8	6	22	0.272727	8	2	15	0.133333
9	5	10	0.5	9	3	8	0.375	9	9	22	0.409091	9	4	37	0.108108
10	5	8	0.625	10	8	15	0.533333	10	7	18	0.388889	10	8	42	0.190476
11	5	14	0.357143	11	11	16	0.6875	11	6	17	0.352941	11	3	15	0.2
12	4	11	0.363636	12	8	11	0.727273	12	7	15	0.466667	12	8	36	0.222222
13	4	15	0.266667	13	3	10	0.3	13	5	18	0.277778	13	6	26	0.230769
avg	5.23077	10.5385	0.510214	avg	6.46154	12.3077	0.501338	14	11	38	0.289474	avg	4.92308	31.0769	0.156953
std	1.42325	2.22169	0.136281	std	3.12558	3.09259	0.155126	15	4	20	0.2	std	2.39658	11.2432	0.0487027
sem	0.394739	0.616185	0.0377975	sem	0.866879	0.85773	0.0430243	16	7	25	0.28	sem	0.664691	3.11831	0.0135077
								17	4	15	0.266667
								18	11	27	0.407407
				t.test	0.87812			19	12	40	0.3	t.test	5.59706e-09
				tdist	0.395819			20	6	25	0.24	tdist	1
								21	12	40	0.3
								22	7	26	0.269231
								avg	6.68182	23	0.289995
								std	2.86832	7.67184	0.0845161
								sem	0.611528	1.63564	0.0180189
								t.test	1.21296e-06
								tdist	0.999999

## Sheet: Panel h
14d
aRW			aJ1			aJ2			aJ1J2
	sebocytes expressing mature markers			sebocytes expressing mature markers			sebocytes expressing mature markers			sebocytes expressing mature markers
1	9		1	10		1	2		1	1
2	8		2	5		2	1		2	1
3	7		3	7		3	2		3	0
4	8		4	8		4	2		4	4
5	8		5	7		5	7		5	1
6	6		6	13		6	8		6	4
7	8		7	5		7	6		7	4
8	10		8	12		8	2		8	1
9	5		9	6		9	4		9	14
10	7		10	6		10	1		10	13
11	7		11	5		11	1		11	2
12	6		12	5		12	5		12	4
13	8		13	6		13	2		13	2
14	5		avg	7.30769		14	4		14	7
15	12		std	2.71982		15	10		15	3
16	6		sem	0.754343		16	1		16	6
17	8					17	2		avg	4.1875
18	6		t.test	0.693296		18	3		std	4.11856
19	11			0.500324		19	2		sem	1.02964
avg	7.63158					20	8
std	1.89181					21	2		t.test	0.00255064
sem	0.434011					22	4			0.997996
						23	2
						24	4
						25	1
						26	0
						27	3
						28	0
						29	1
						avg	3.10345
						std	2.55434
						sem	0.474328
						t.test	3.4003e-08
							1

## Sheet: Panel l
aRW 14d			aJ1			aJ2 14d			aJ1J2
	#of AR+ basal cells			#of AR+ basal cells			#of AR+ basal cells			#of AR+ basal cells
1	4		1	2		1	4		1	14
2	4		2	1		2	4		2	5
3	2		3	2		3	4		3	4
4	4		4	3		4	6		4	2
5	5		5	1		5	4		5	3
6	2		6	4		6	3		6	9
7	1		7	3		7	3		7	6
8	1		avg	2.28571		8	1		8	4
9	3		std	1.1127		9	2		9	2
10	5		sem	0.42056		10	2		10	3
avg	3.1					11	2		11	5
std	1.52388					12	3		12	3
sem	0.481894		t.test	0.247861		13	4		13	10
				0.811355		14	3		14	3
						15	3		15	8
						16	5		16	8
						17	2		17	4
						18	1		18	7
						19	0		avg	5.55556
						20	2		std	3.22166
						21	2		sem	0.759352
						22	1
						23	7		t.test	0.0324368
						avg	2.95652			0.974762
						std	1.66456
						sem	0.347084
						t.test	0.817214
							0.432845
