# Supplementary material for: The Jag2/Notch1 signaling axis promotes sebaceous gland differentiation and controls progenitor proliferation
Source: eLife. 2024 Nov 25;13:RP98747. doi: 10.7554/eLife.98747 (PMC11588336; doi:10.7554/eLife.98747)
Supplement: Figure 5—source data 1. [file elife-98747-fig5-data1.xlsx]

## Sheet: Panel b
Day 14
aRW	Proper SG	Mix of some sebocytes and some epithelial cells?	Could not see any sebocytes	Total	proper SG %	mixed SG %	SG with only epithelial cells %	Total %	Proper SG	Mixed SG	No sebocyte SG			Proper SG	Mixed SG	No sebocyte SG
1-1	102	10	2	114	0.894737	0.0877193	0.0175439	1	0.897339	0.0735328	0.0291283		aRW	0.897339	0.0735328	0.0291283
1-2	94	9	2	105	0.895238	0.0857143	0.0190476	1					aJAG1	0.879241	0.0787797	0.0419791
1-3	96	6	5	107	0.897196	0.0560748	0.046729	1					aJAG2	0.233001	0.560683	0.206316
1-4	76	6	3	85	0.894118	0.0705882	0.0352941	1					aJ1J2	0.194193	0.548219	0.257587
1-5	67	5	2	74	0.905405	0.0675676	0.027027	1
Average	435	36	14	485	0.897339	0.0735328	0.0291283
stdev					0.00465428	0.0132163	0.0121247
sem					0.00208146	0.00591051	0.00542234
aJAG1	Proper SG	Mix of some sebocytes and some epithelial cells?	Could not see any sebocytes	Total	proper SG %	mixed SG %	SG with only epithelial cells %	Total %	Proper SG	Mixed SG	No sebocyte SG
2-6	65	5	4	74	0.878378	0.0675676	0.0540541	1	0.879241	0.0787797	0.0419791
2-7	78	9	3	90	0.866667	0.1	0.0333333	1
2-8	76	10	1	87	0.873563	0.114943	0.0114943	1
2-9	78	6	7	91	0.857143	0.0659341	0.0769231	1
2-10	81	4	3	88	0.920455	0.0454545	0.0340909	1
Average	378	34	18	430	0.879241	0.0787797	0.0419791
stdev					0.0243823	0.028104	0.0246637
sem					0.0109041	0.0125685	0.0110299
aJAG2	Proper SG	Mix of some sebocytes and some epithelial cells?	Could not see any sebocytes	Total	proper SG %	mixed SG %	SG with only epithelial cells %	Total %	Proper SG	Mixed SG	No sebocyte SG
3-11	14	37	19	70	0.2	0.528571	0.271429	1	0.233001	0.560683	0.206316
3-12	17	47	16	80	0.2125	0.5875	0.2	1
3-13	21	45	10	76	0.276316	0.592105	0.131579	1
3-14	15	47	22	84	0.178571	0.559524	0.261905	1
3-15	25	45	14	84	0.297619	0.535714	0.166667	1
Average	92	221	81	394	0.233001	0.560683	0.206316
stdev					0.0512923	0.0289933	0.0602647
sem					0.0229386	0.0129662	0.0269512
aJ1J2	Proper SG	Mix of some sebocytes and some epithelial cells?	Could not see any sebocytes	Total	proper SG %	mixed SG %	SG with only epithelial cells %	Total %	Proper SG	Mixed SG	No sebocyte SG
4-16	8	40	22	70	0.114286	0.571429	0.314286	1	0.194193	0.548219	0.257587
4-17	22	44	15	81	0.271605	0.54321	0.185185	1
4-18	12	53	12	77	0.155844	0.688312	0.155844	1
4-19	20	37	20	77	0.25974	0.480519	0.25974	1
4-20	10	27	22	59	0.169492	0.457627	0.372881	1
Average	72	201	91	364	0.194193	0.548219	0.257587
stdev					0.0684745	0.0908018	0.0895905
sem					0.0306227	0.0406078	0.0400661
Chi square test
		observed						observed						observed
	Proper SG	Mixed SG	No sebocyte SG	total			Proper SG	Mixed SG	No sebocyte SG	total			Proper SG	Mixed SG	No sebocyte SG	total
aRW	435	36	14	485		aRW	435	36	14	485		aRW	435	36	14	485
aJAG1	378	34	18	430		aJAG2	92	221	81	394		aJ1J2	72	201	91	364
total	813	70	32	915		total	527	257	95	879		total	507	237	105	849
		expected						expected						expected
	Proper SG	Mixed SG	No sebocyte SG	total			Proper SG	Mixed SG	No sebocyte SG	total			Proper SG	Mixed SG	No sebocyte SG	total
aRW	430.934	37.1038	16.9617			aRW	290.779	141.803	52.4175			aRW	289.629	135.389	59.9823
aJAG1	382.066	32.8962	15.0383			aJAG2	236.221	115.197	42.5825			aJ1J2	217.371	101.611	45.0177
0.534736						2.9049e-87						1.73126e-92

## Sheet: Panel e
aRW 3d					aJ2 3d						aRW 7d					aJ2 7d
	total basal cells	N1ICD+ve	N1ICD%			total basal cells	N1ICD+ve	N1ICD%				#N1ICD/SG	total scs	%			#N1ICD/SG	total scs	%
1	9	8	0.888889		1	10	0	0			1	4	10	0.4		1	5	18	0.277778
2	8	7	0.875		2	7	0	0			2	9	13	0.692308		2	5	19	0.263158
3	7	2	0.285714		3	9	0	0			3	7	11	0.636364		3	2	14	0.142857
4	10	4	0.4		4	9	0	0			4	4	9	0.444444		4	4	25	0.16
5	11	3	0.272727		5	7	0	0			5	5	8	0.625		5	4	23	0.173913
6	11	5	0.454545		6	7	0	0			6	5	9	0.555556		6	4	16	0.25
7	7	3	0.428571		7	12	0	0			7	6	9	0.666667		7	9	23	0.391304
8	7	6	0.857143		8	8	0	0			8	5	10	0.5		8	6	22	0.272727
9	7	4	0.571429		9	8	0	0			9	5	10	0.5		9	9	22	0.409091
10	7	4	0.571429		10	7	0	0			10	5	8	0.625		10	7	18	0.388889
11	7	4	0.571429		11	7	0	0			11	5	14	0.357143		11	6	17	0.352941
12	7	5	0.714286		12	9	0	0			12	4	11	0.363636		12	7	15	0.466667
13	7	5	0.714286		13	7	0	0			13	4	15	0.266667		13	5	18	0.277778
avg			0.585034		14	9	0	0			avg	5.23077	10.5385	0.510214		14	11	38	0.289474
std			0.213559		15	13	1	0.0769231			std	1.42325	2.22169	0.136281		15	4	20	0.2
sem			0.0592307		avg			0.00512821			sem	0.394739	0.616185	0.0377975		16	7	25	0.28
					std			0.0198615								17	4	15	0.266667
					sem			0.00512821								18	11	27	0.407407
																19	12	40	0.3
											t.test	0.297538				20	6	25	0.24
											tdist	0.770757				21	12	40	0.3
																22	7	26	0.269231
																avg	6.68182	23	0.289995
																std	2.86832	7.67184	0.0845161
																sem	0.611528	1.63564	0.0180189
																t.test	1.00188e-14
																tdist	1

## Sheet: Panel h
7d										14d
aRW	sebocytes expressing mature markers				aJ2	sebocytes expressing mature markers				aRW	sebocytes expressing mature markers			aJ2	sebocytes expressing mature markers
1	6				1	1				1	9			1	2
2	8				2	1				2	8			2	1
3	8				3	1				3	7			3	2
4	7				4	0				4	8			4	2
5	7				5	2				5	8			5	7
6	11				6	1				6	6			6	8
7	10				7	1				7	8			7	6
8	5				8	0				8	10			8	2
9	7				9	1				9	5			9	4
10	8				10	0				10	7			10	1
11	10				11	3				11	7			11	1
12	4				12	0				12	6			12	5
13	4				13	1				13	8			13	2
14	4				14	0				14	5			14	4
15	4				15	0				15	12			15	10
16	8				16	0				16	6			16	1
17	4				17	0				17	8			17	2
18	9				18	1				18	6			18	3
avg	6.88889				19	1				19	11			19	2
std	2.32351				20	1				avg	7.63158			20	8
sem	0.547656				21	1				std	1.89181			21	2
					22	1				sem	0.434011			22	4
					avg	0.772727								23	2
					std	0.751622								24	4
					sem	0.160246				t.test	0.292456			25	1
											0.773282			26	0
														27	3
														28	0
														29	1
														avg	3.10345
														std	2.55434
														sem	0.474328
														t.test	0.000137635
															0.999891

## Sheet: Panel k
7 days							14 days
aRW 7d	#of AR+ basal cells		aJ2 7d	#of Lrig1+AR+ cells			aRW 14d	#of AR+ basal cells		aJ2 14d	#of AR+ basal cells
1	3		1	9			1	4		1	4
2	4		2	11			2	4		2	4
3	3		3	14			3	2		3	4
4	4		4	11			4	4		4	6
5	5		5	12			5	5		5	4
6	4		6	10			6	2		6	3
7	4		7	4			7	1		7	3
8	3		8	10			8	1		8	1
9	4		9	14			9	3		9	2
10	4		10	8			10	5		10	2
11	2		11	17			avg	3.1		11	2
12	4		12	10			std	1.52388		12	3
avg	3.66667		13	6			sem	0.481894		13	4
std	0.778499		14	8						14	3
sem	0.224733		15	19						15	3
			16	9						16	5
			17	6						17	2
			18	2						18	1
			avg	10						19	0
			std	4.27028						20	2
			sem	1.00651						21	2
										22	1
										23	7
										avg	2.95652
										std	1.66456
										sem	0.347084
t.test	0.27297		9.53024e-09
tdist	0.790431		1							t.test	0.817214
											0.432845
